# Supplementary material
Source: PubMed Central journal article supplement (PMC9021867)
Supplement: NIHMS1790787-supplement-1.pdf [file NIHMS1790787-supplement-1.pdf]

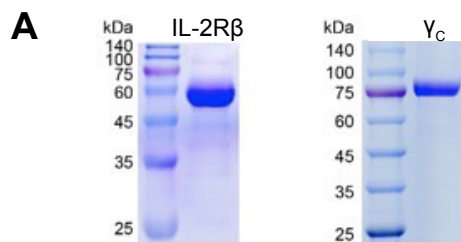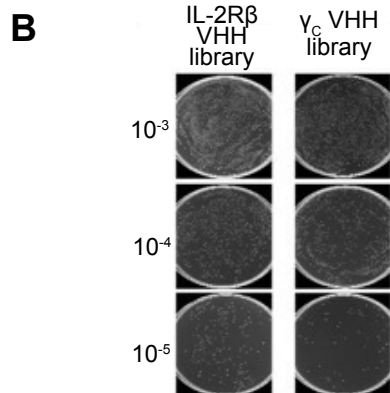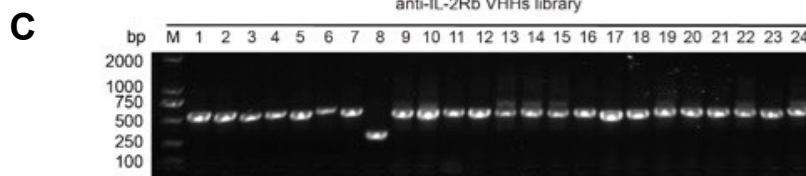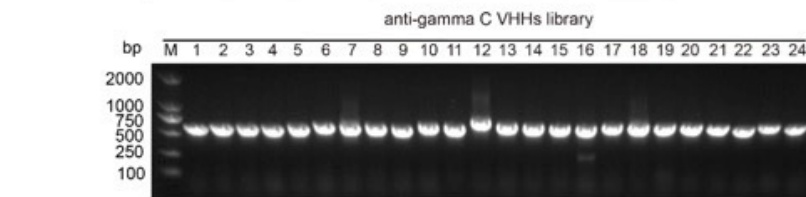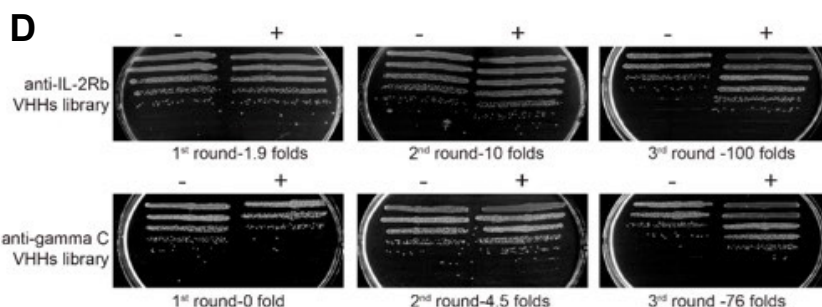

**E IL-2β VHH Alignment**

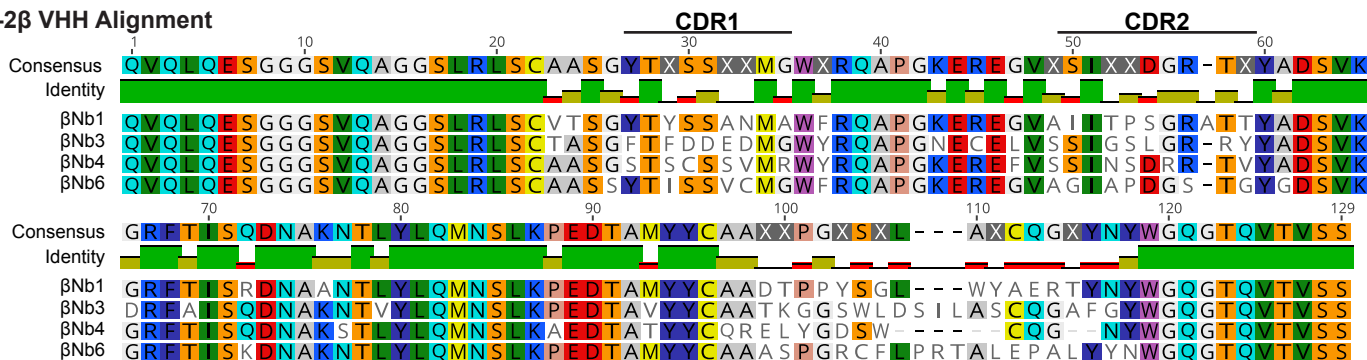

**γC VHH Alignment**

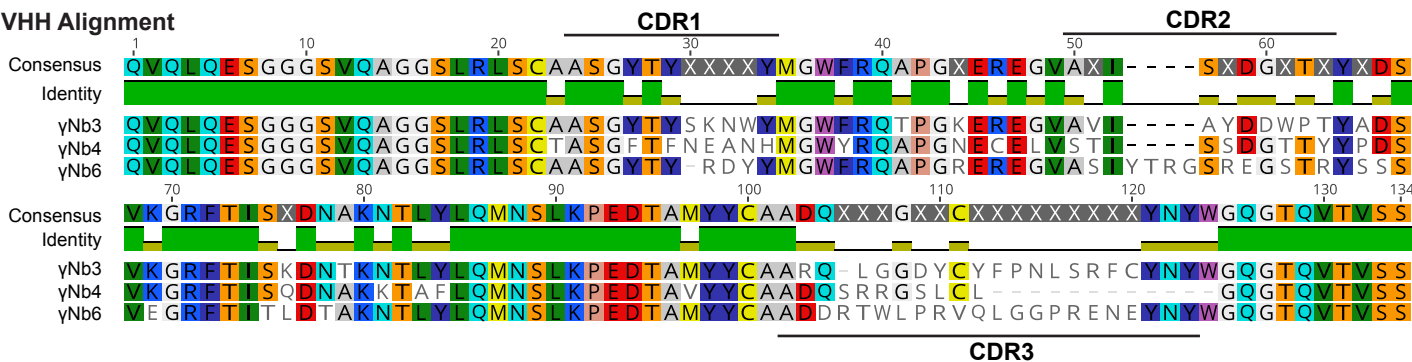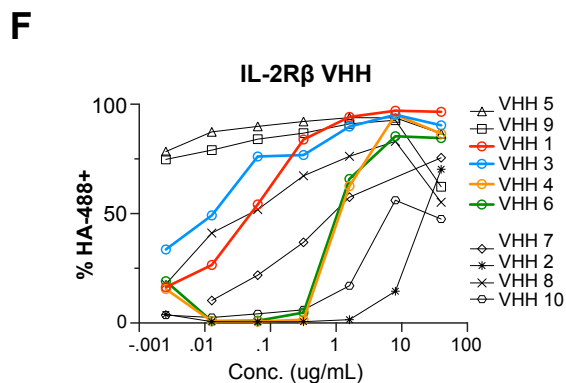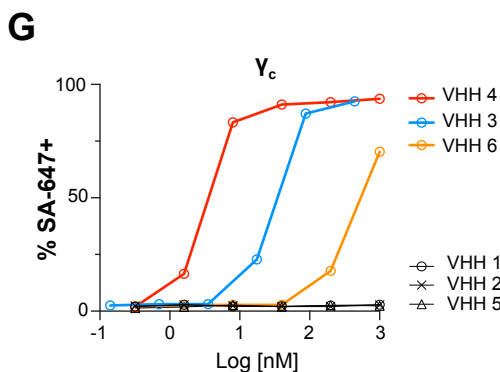

**H**

| VHH / scFv     | K <sub>D</sub> (nM) |
|----------------|---------------------|
| β VHH 1        | 11                  |
| β VHH 3        | 20                  |
| β VHH 4        | 123                 |
| β VHH 6        | 25                  |
| γ VHH 3        | 7                   |
| γ VHH 4        | 20                  |
| γ VHH 6        | 69                  |
| γ scFv1 (P1A3) | 145                 |
| γ scFv2 (P2B9) | 79                  |
