# Supplementary material
Source: PubMed Central journal article supplement (PMC9021867)

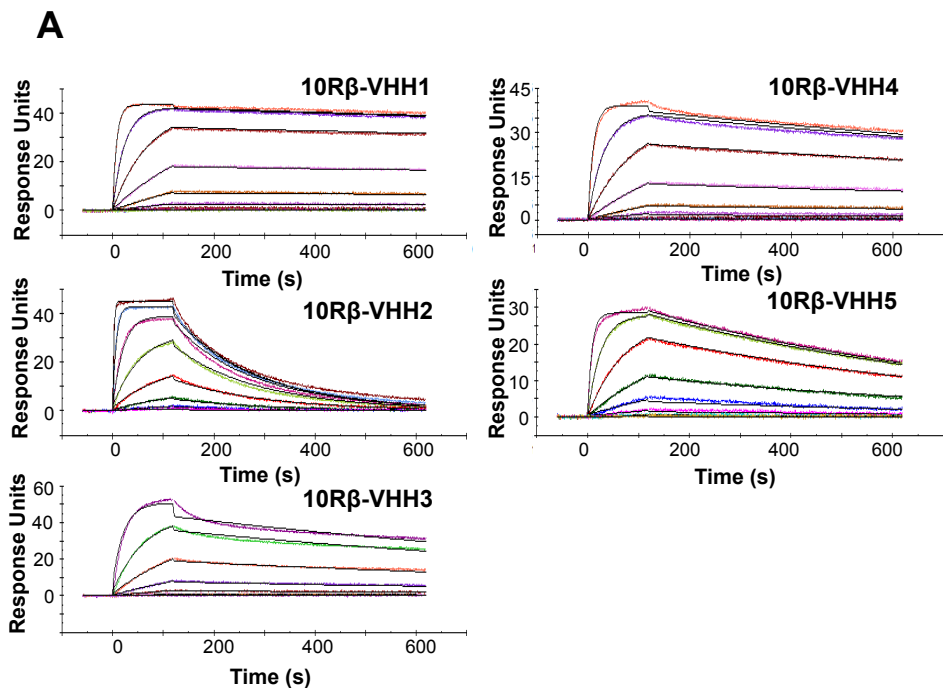

**B**

| IL-10Rβ VHH | Binding constants (from kinetic fits) |                   |                      |
|-------------|---------------------------------------|-------------------|----------------------|
|             | $K_D$ (nM)                            | $K_a$             | $K_d$                |
| VHH1        | 1.6                                   | $9.5 \times 10^4$ | $1.5 \times 10^{-4}$ |
| VHH2        | 2.2                                   | $3.2 \times 10^6$ | $7.0 \times 10^{-3}$ |
| VHH3        | 2.5                                   | $3.0 \times 10^5$ | $7.6 \times 10^{-4}$ |
| VHH4        | 2.2                                   | $2.1 \times 10^5$ | $4.7 \times 10^{-4}$ |
| VHH5        | 1.7                                   | $7.8 \times 10^5$ | $1.3 \times 10^{-3}$ |

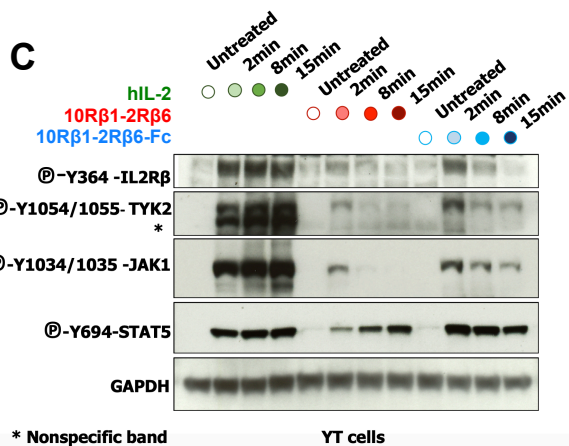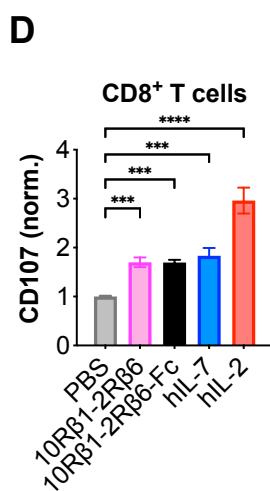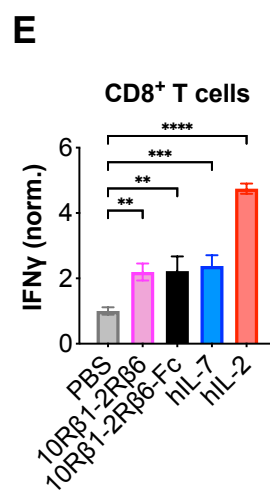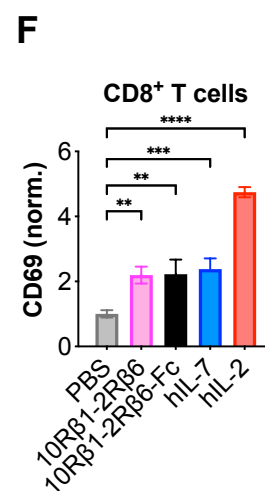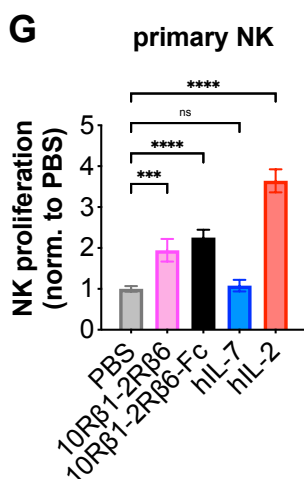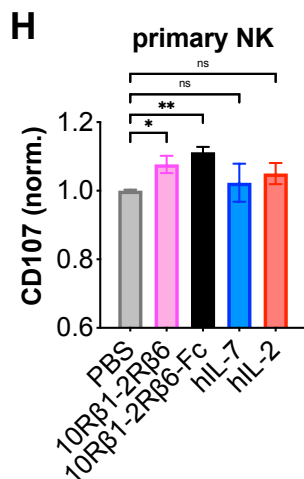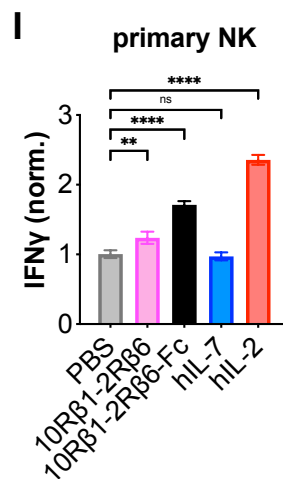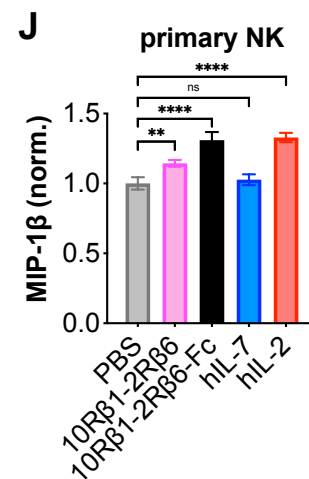

Supplement: NIHMS1790787-supplement-7.pdf [file NIHMS1790787-supplement-7.pdf]
