# Supplementary material
Source: PubMed Central journal article supplement (PMC9021867)

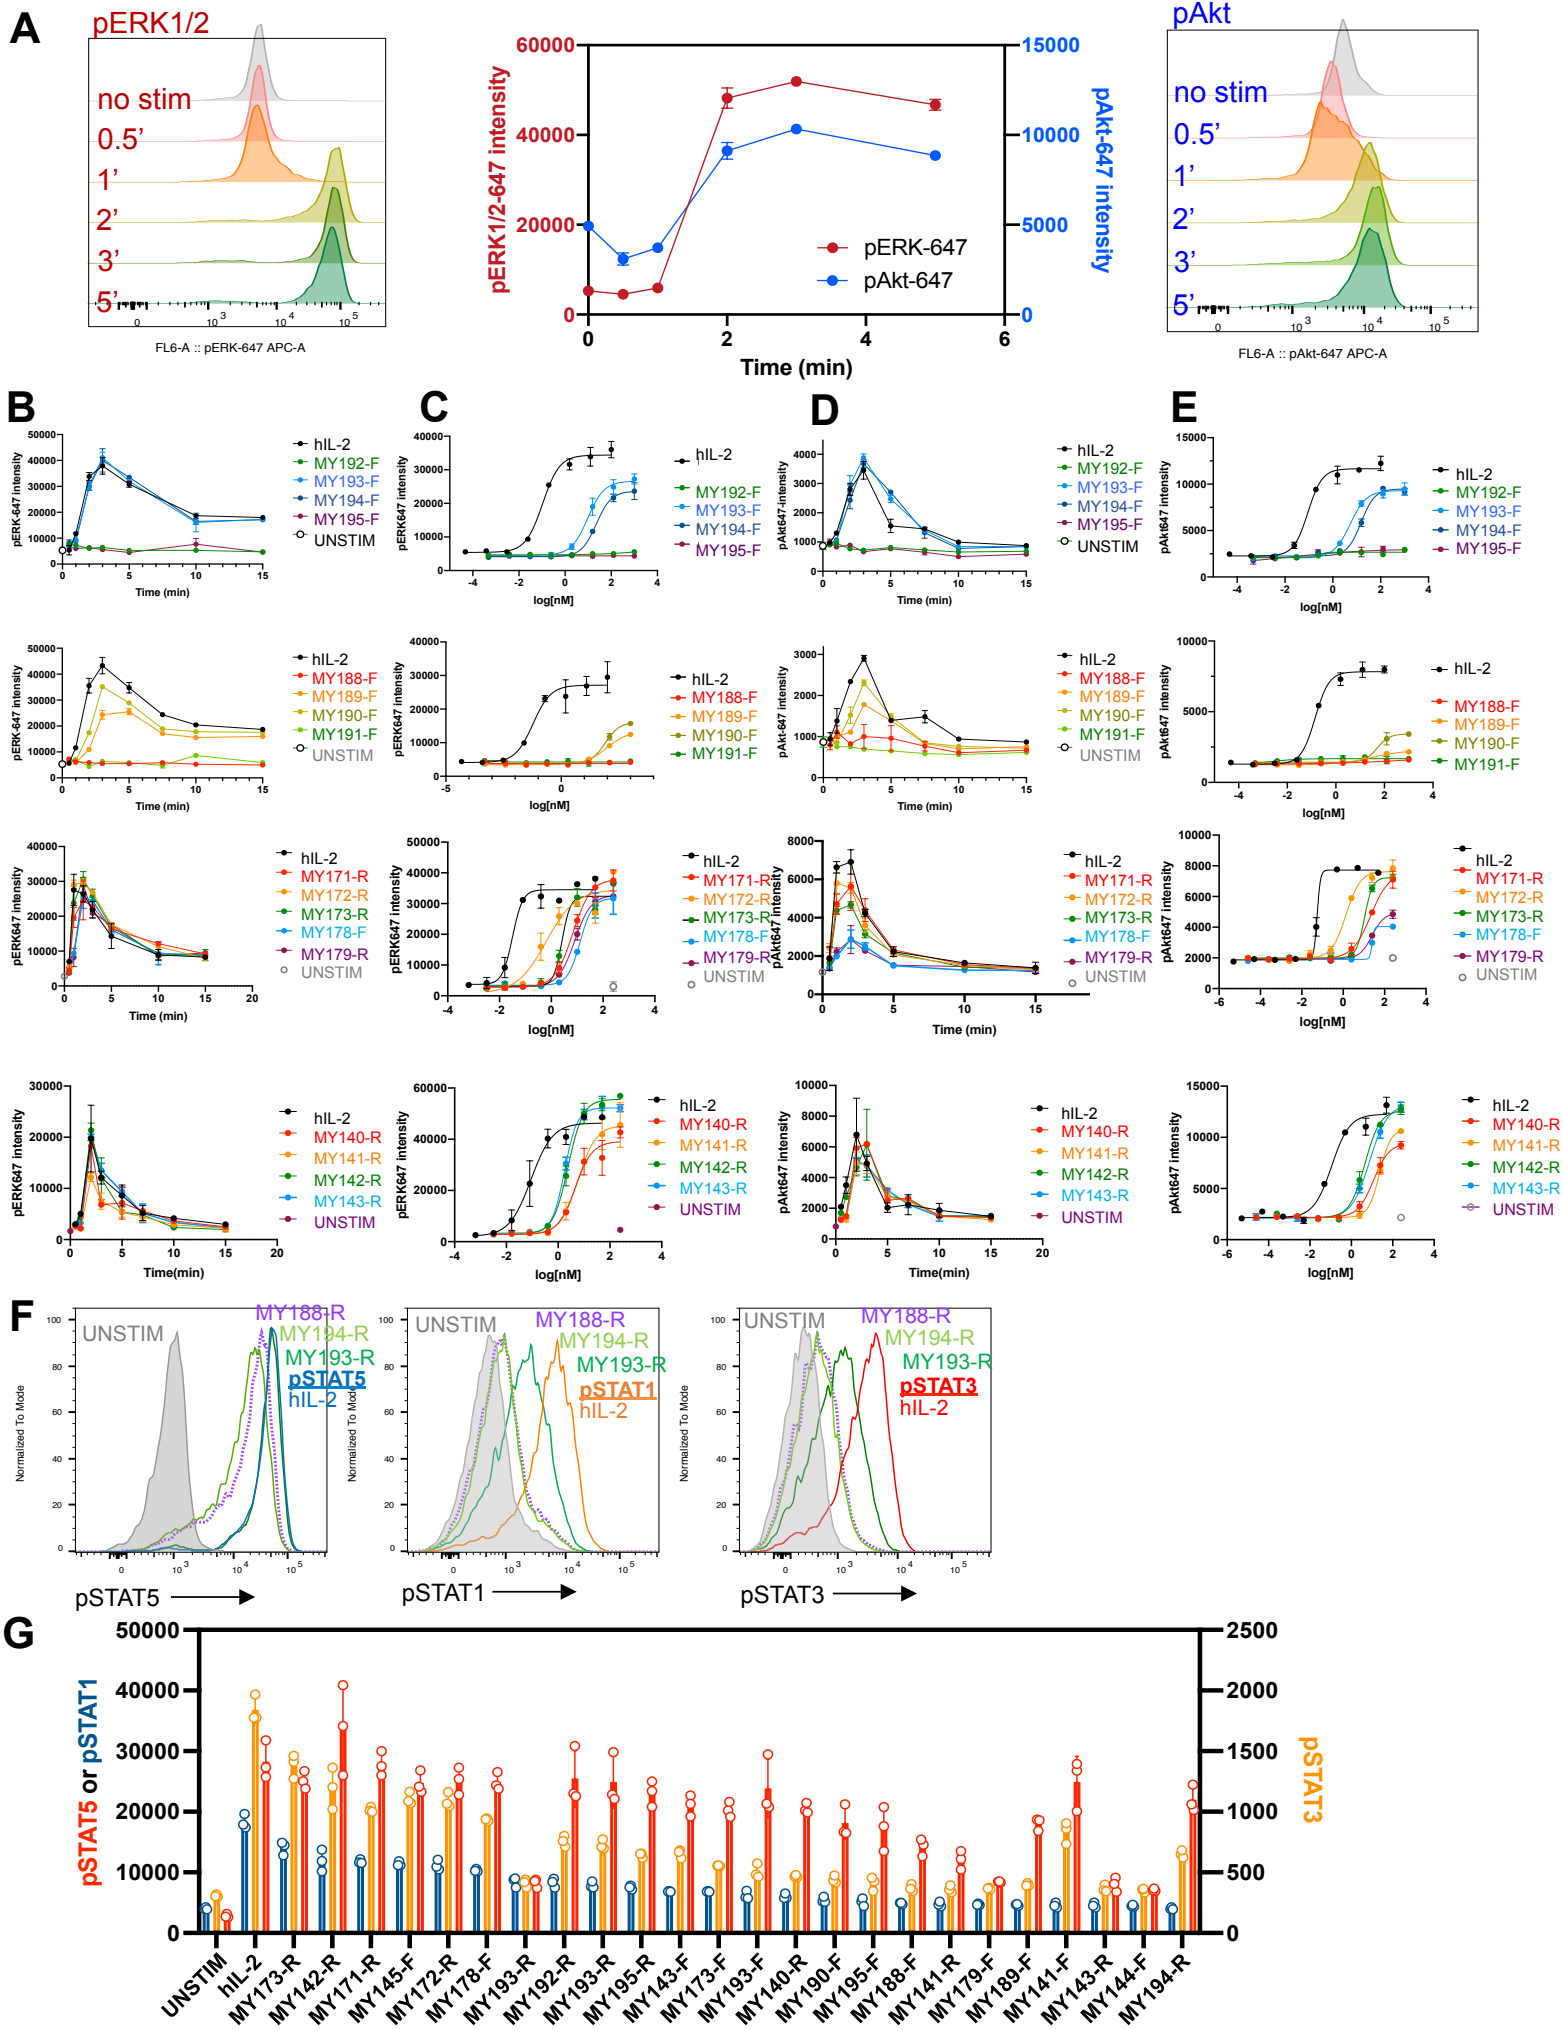

Supplement: NIHMS1790787-supplement-3.pdf [file NIHMS1790787-supplement-3.pdf]

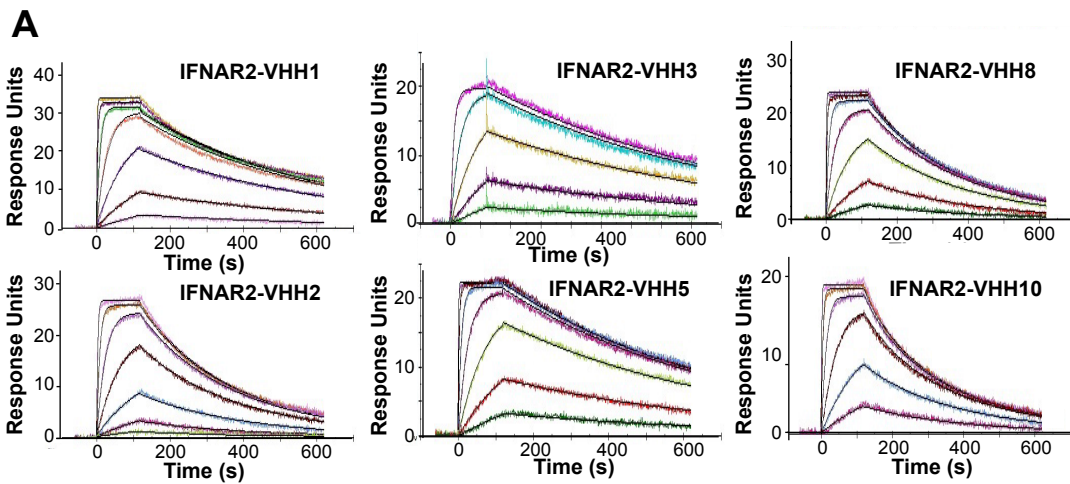

**B**

| IFNAR2 VHH | Binding constants (from kinetic fits) |         |        |
|------------|---------------------------------------|---------|--------|
|            | $K_D$ (nM)                            | $K_a$   | $K_d$  |
| VHH1       | 0.31                                  | 6.75e+6 | 2.1e-3 |
| VHH2       | 0.78                                  | 5.52e+6 | 4.3e-3 |
| VHH3       | 0.21                                  | 5.5e+6  | 1.2e-3 |
| VHH5       | 0.23                                  | 7.2e+6  | 1.7e-3 |
| VHH8       | 0.54                                  | 7.5e+6  | 4.1e-3 |
| VHH10      | 0.33                                  | 1.9e+7  | 6.2e-3 |

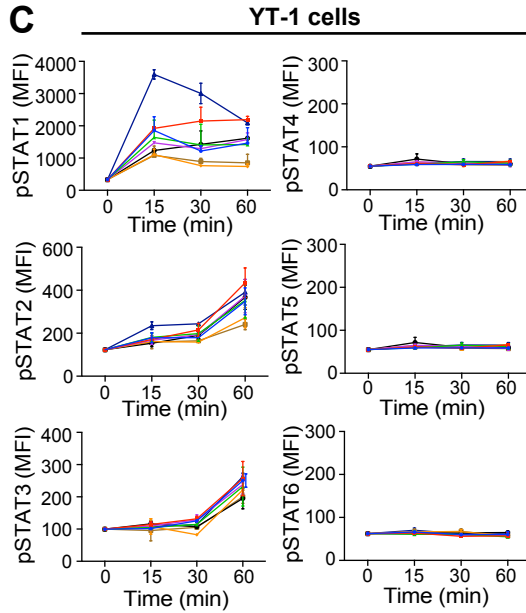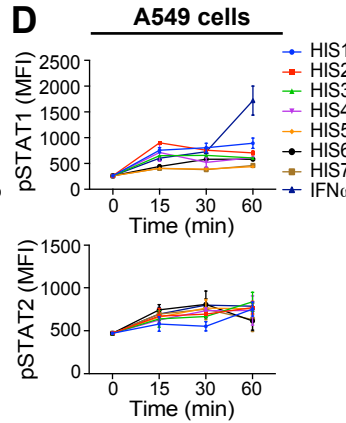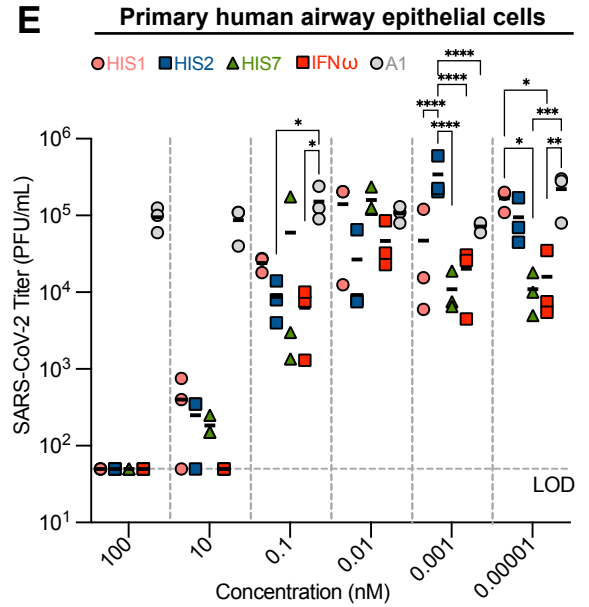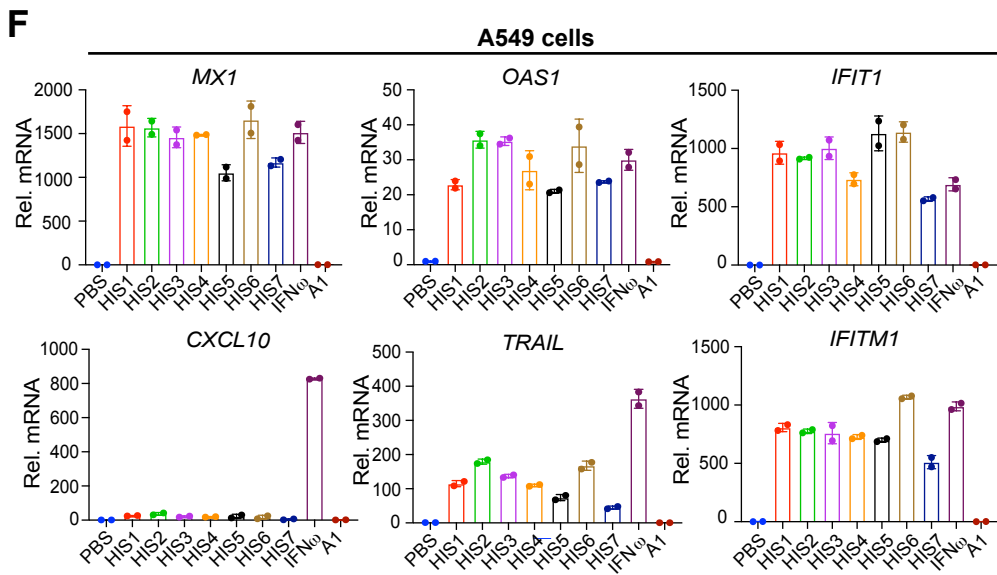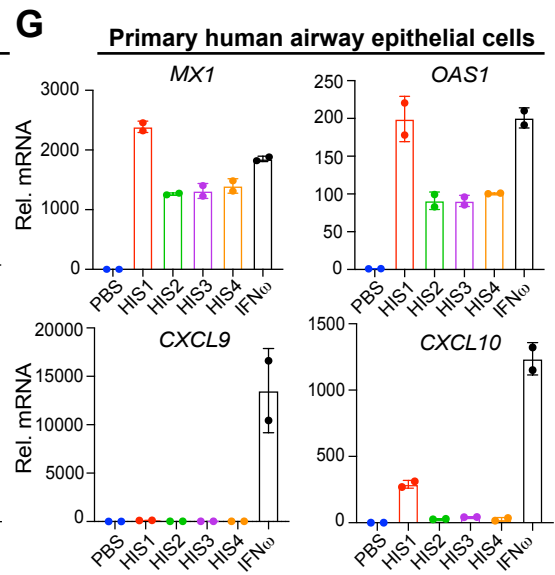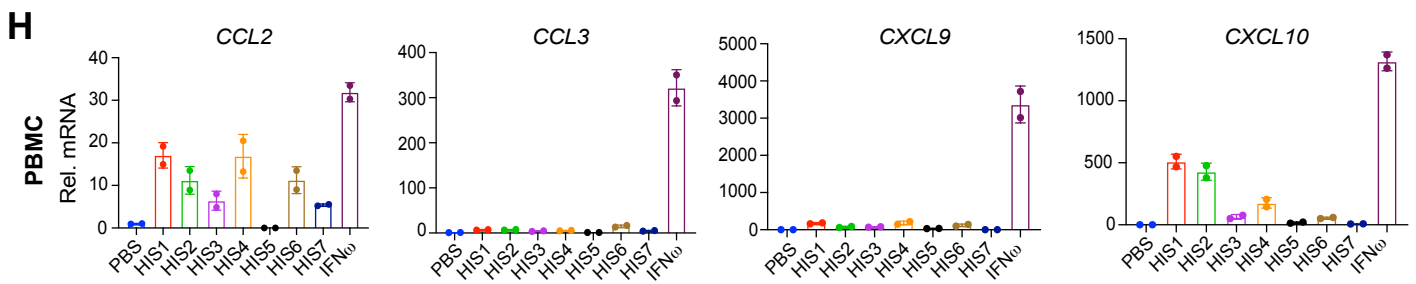

Supplement: NIHMS1790787-supplement-6.pdf [file NIHMS1790787-supplement-6.pdf]
